# Supplementary material for: Measuring affective well-being at work using short-form scales: Implications for affective structures and participant instructions
Source: PubMed Central journal article supplement (PMC6146316; doi:10.1177/0018726717751034), 2018-04-13
Supplement: HUM751034_Supplementary_Material.pdf [file HUM751034_Supplementary_Material.pdf]

**Measuring affective well-being at work using short-form scales: Implications for affective structures and participant instructions**

*Emma Russell and Kevin Daniels*

**Table 2: Means, standard deviations, skew and kurtosis values for 10-item Daniels Five-factor measure of Affective Well-being (D-FAW)**

| Well-being scale                        | Range | Mean | Standard deviation | Skew  | Kurtosis |
|-----------------------------------------|-------|------|--------------------|-------|----------|
| Sample 1 (SE: 0.15 Skew; 0.31 Kurtosis) |       |      |                    |       |          |
| AC (N=253)                              | 5.00  | 3.81 | 1.23               | -0.57 | -.82     |
| AP (N=253)                              | 5.00  | 3.82 | 1.05               | -0.14 | -.39     |
| BE (N=254)                              | 5.00  | 4.30 | 1.29               | -0.59 | -.59     |
| TV (N=251)                              | 5.00  | 3.70 | 1.06               | -0.02 | -.27     |
| DP (N=252)                              | 5.00  | 4.22 | 1.10               | -0.66 | .08      |
| Sample 2 (SE: 0.06 Skew; 0.12 Kurtosis) |       |      |                    |       |          |
| AC (N=1794)                             | 5.00  | 3.69 | 1.07               | -0.26 | -0.34    |
| AP (N=1794)                             | 5.00  | 3.70 | 1.03               | -0.18 | -0.44    |
| BE (N=1794)                             | 5.00  | 4.04 | 1.06               | -0.48 | -0.09    |
| TV (N=1794)                             | 5.00  | 3.64 | 1.02               | -0.20 | -0.44    |
| DP (N=1794)                             | 5.00  | 3.94 | 1.07               | -0.33 | -0.35    |
| Sample 3 (SE: 0.13 Skew; 0.26 Kurtosis) |       |      |                    |       |          |
| AC (N=340)                              | 4.50  | 4.04 | 0.95               | -0.30 | -0.39    |
| AP (N=340)                              | 4.50  | 4.24 | 0.87               | -0.38 | -0.13    |
| BE (N=340)                              | 4.00  | 4.45 | 0.88               | -0.51 | -0.19    |
| TV (N=340)                              | 4.50  | 3.96 | 0.90               | -0.39 | -0.36    |
| DP (N=340)                              | 4.50  | 4.30 | 0.96               | -0.54 | -0.09    |
| Sample 4 (SE: 0.15 Skew; 0.29 Kurtosis) |       |      |                    |       |          |
| AC (n=284/N=36)                         | 5.00  | 3.99 | 1.19/0.92          | -0.29 | -0.49    |
| AP (n=284/ N=36)                        | 5.00  | 4.39 | 1.15/0.91          | -0.81 | 0.26     |
| BE (n=284/ N=36)                        | 5.00  | 4.80 | 0.80/0.56          | -1.11 | 2.76     |
| TV (n=284/ N=36)                        | 5.00  | 4.01 | 1.13/0.86          | -0.38 | -0.30    |
| DP (n=284/ N=36)                        | 5.00  | 4.70 | 1.05/0.76          | -1.16 | 1.45     |
| Sample 5 (SE: 0.10 Skew; 0.20 Kurtosis) |       |      |                    |       |          |
| AC (n=570/N=39)                         | 5.00  | 4.36 | 1.09/0.84          | 0.68  | -0.26    |
| AP (n=569/ N=39)                        | 4.50  | 4.44 | 0.97/0.73          | 0.75  | 0.11     |
| BE (n=570/ N=39)                        | 5.00  | 4.32 | 0.97/0.74          | -0.44 | -0.32    |
| TV (n=571/ N=39)                        | 5.00  | 3.79 | 1.06/0.80          | -0.06 | -0.42    |
| DP (n=570/ N=39)                        | 5.00  | 4.74 | 0.98/0.72          | -1.04 | 0.67     |
| Sample 6 (SE: 0.08 Skew; 0.16 Kurtosis) |       |      |                    |       |          |
| AC (n=927/N=98)                         | 5.00  | 4.48 | 1.02/0.57          | -0.55 | -0.03    |
| AP (n=923/ N=98)                        | 4.50  | 4.71 | 0.95/0.59          | -0.78 | 0.22     |
| BE (n=921/ N=98)                        | 5.00  | 4.40 | 0.96/0.47          | -0.51 | -0.07    |
| TV (n=925/ N=98)                        | 4.50  | 3.74 | 1.01/0.49          | -0.19 | -0.26    |

DP (n=922/ N=98)

5.00

4.88

0.90/0.41

-0.93

0.55

---

*Notes:* AC = Anxiety–Comfort; AP- Angry–Placid; BE = Bored–Enthusiastic; TV = Tiredness–Vigor; DP = Displeasure–Pleasure; SE = Standard Error; n/N given is the minimum overall; all scales are scored in the positive direction so that a high score indicates positive well-being; data from multi-level samples (4, 5 and 6) is provided at level-1; For samples 4–6 standard deviations (SDs) are reported for level-1 and then level-2 data, with level-2 SDs calculated by taking the SD for each individual’s set of level-1 data and then averaging these across N cases at level-2.

**Table 3: Bayesian fit and convergent statistics for different models**

| Model number                                                                                              | Fit statistics | Sample 1  | Sample 2   | Sample 3                                                                                         | Sample 4       | Sample 5                                                                                         | Sample 6                                                                                         |
|-----------------------------------------------------------------------------------------------------------|----------------|-----------|------------|--------------------------------------------------------------------------------------------------|----------------|--------------------------------------------------------------------------------------------------|--------------------------------------------------------------------------------------------------|
| <u>1. Single factor</u><br>Overall well-being: OWB                                                        | PSR            | = 1.01    | = 1.02     | = 1.01                                                                                           | = 1.02         | = 1.01                                                                                           | = 1.02                                                                                           |
|                                                                                                           | PPC            | = p < .01 | = p < .01  | = p < .01                                                                                        | = p < .01      | = p < .01                                                                                        | = p < .01                                                                                        |
|                                                                                                           | DIC            | = 7912.46 | = 53210.77 | = 9127.95                                                                                        | = 7300.67      | = 14876.29                                                                                       | = 19182.73                                                                                       |
|                                                                                                           | Loadings       | +         | +          | +                                                                                                | +              | ? (17/18)                                                                                        | +                                                                                                |
| <u>2. Single factor with response bias factors</u>                                                        | PSR            | 1.04      | = 1.02     | <b>This model would not converge even after increasing convergence criterion from .01 to .05</b> | = 1.02         | <b>This model would not converge even after increasing convergence criterion from .01 to .05</b> | <b>This model would not converge even after increasing convergence criterion from .01 to .05</b> |
|                                                                                                           | PPC            | = p < .01 | = p < .01  |                                                                                                  | = ns (p > .05) |                                                                                                  |                                                                                                  |
|                                                                                                           | DIC            | = 7746.91 | = 51474.95 |                                                                                                  | = 7173.86      |                                                                                                  |                                                                                                  |
|                                                                                                           | Loadings       | -         | --         |                                                                                                  | ? (17/18)      |                                                                                                  |                                                                                                  |
| <u>3. Two factor</u><br>NA = AC, AP and DP<br>PA = TV and BE and DP                                       | PSR            | = 1.01    | = 1.02     | = 1.01                                                                                           | = 1.02         | = 1.02                                                                                           | = 1.02                                                                                           |
|                                                                                                           | PPC            | = p < .01 | = p < .01  | = p < .01                                                                                        | = p < .01      | = p < .01                                                                                        | = p < .01                                                                                        |
|                                                                                                           | DIC            | = 7820.04 | = 52827.49 | = 9058.48                                                                                        | = 7272.7       | = 14560.64                                                                                       | = 19016.07                                                                                       |
|                                                                                                           | Loadings       | +         | +          | +                                                                                                | ? (17/20)      | ? (19/20)                                                                                        | +                                                                                                |
| <u>4. Two factor with response bias factors</u>                                                           | PSR            | = 1.02    | = 1.02     | = 1.02                                                                                           | = 1.02         | = 1.02                                                                                           | = 1.02                                                                                           |
|                                                                                                           | PPC            | = p > .10 | = p < .01  | = ns (p > .20)                                                                                   | = ns (p > .13) | = p < .05                                                                                        | = p < .01                                                                                        |
|                                                                                                           | DIC            | = 7722.45 | = 51396.77 | = 8831.59                                                                                        | = 7162.65      | = 14397.32                                                                                       | = 18893.87                                                                                       |
|                                                                                                           | Loadings       | ? (11/12) | -          | ? 6/8                                                                                            | +              | ? (19/20)                                                                                        | ? (18/20)                                                                                        |
| <u>5. Discrete first-order factors</u><br>AC, AP, BE, TV and DP                                           | PSR            | = 1.01    | = 1.02     | = 1.02                                                                                           | = 1.02         | = 1.02                                                                                           | = 1.02                                                                                           |
|                                                                                                           | PPC            | = p < .01 | = p < .01  | = p < .01                                                                                        | = p < .01      | = p < .01                                                                                        | = p < .01                                                                                        |
|                                                                                                           | DIC            | = 7814.21 | = 52524.69 | = 9046.34                                                                                        | = 7260.04      | = 14523.66                                                                                       | = 19016.07                                                                                       |
|                                                                                                           | Loadings       | +         | +          | +                                                                                                | +              | ? (9/10)                                                                                         | +                                                                                                |
| <u>6. Discrete first-order factors with response bias factors</u>                                         | PSR            | = 1.02    | = 1.02     | = 1.02                                                                                           | = 1.02         | = 1.02                                                                                           | = 1.02                                                                                           |
|                                                                                                           | PPC            | = p > .15 | = p < .01  | = p < .05                                                                                        | = ns (p > .15) | = p < .05                                                                                        | = p < .01                                                                                        |
|                                                                                                           | DIC            | = 7726.82 | = 51416.18 | = 8845.68                                                                                        | = 7145.43      | = 14394.31                                                                                       | = 18875.76                                                                                       |
|                                                                                                           | Loadings       | +         | +          | =                                                                                                | +              | +                                                                                                | +                                                                                                |
| <u>7. Discrete first-order factors loading onto one second order factor</u><br>AC, AP, BE, TV and DP; OWB | PSR            | = 1.02    | (C) = 1.08 | = 1.02                                                                                           | = 1.02         | = 1.02                                                                                           | = 1.02                                                                                           |
|                                                                                                           | PPC            | = p < .01 | = p < .01  | = p < .01                                                                                        | = p < .01      | = p < .01                                                                                        | = p < .01                                                                                        |
|                                                                                                           | DIC            | = 7863.83 | = 52934.6  | = 9103.26                                                                                        | = 7291.54      | = 14799.81                                                                                       | = 19150.24                                                                                       |
|                                                                                                           | Loadings       | +         | +          | +                                                                                                | +              | ? (19/20)                                                                                        | +                                                                                                |
| <u>8. Discrete first-order factors loading onto one second order factor with response bias factors</u>    | PSR            | = 1.02    | = 1.02     | = 1.02                                                                                           | = 1.02         | = 1.02                                                                                           | = 1.02                                                                                           |
|                                                                                                           | PPC            | = p < .01 | = p < .01  | = ns (p > .08)                                                                                   | = ns (p > .11) | = p < .01                                                                                        | = p < .01                                                                                        |
|                                                                                                           | DIC            | = 7748.71 | = 51403.91 | = 8842.54                                                                                        | = 7158.08      | = 14405.03                                                                                       | = 18896.25                                                                                       |
|                                                                                                           | Loadings       | ?         | --         | +                                                                                                | ? (8/10)       | -                                                                                                | --                                                                                               |

|                                                                                                                                         |          |                |                                                                                                  |                                                                                                  |                |            |            |
|-----------------------------------------------------------------------------------------------------------------------------------------|----------|----------------|--------------------------------------------------------------------------------------------------|--------------------------------------------------------------------------------------------------|----------------|------------|------------|
| <u>9. Discrete first-order factors for PA items and single NA factor</u><br>BE, TV and DP and NA                                        | PSR      | = 1.01         | = 1.02                                                                                           | = 1.01                                                                                           | = 1.02         | = 1.02     | = 1.02     |
|                                                                                                                                         | PPC      | = p < .01      | = p < .01                                                                                        | = p < .01                                                                                        | = p < .01      | = p < .01  | = p < .01  |
|                                                                                                                                         | DIC      | = 7818.11      | = 52563.47                                                                                       | = 9045.25                                                                                        | = 7257.25      | = 14565.82 | = 19025.05 |
|                                                                                                                                         | Loadings | +              | +                                                                                                | +                                                                                                | +              | ? (11/12)  | +          |
| <u>10. Discrete first-order factors for PA items and single NA factor with response bias factors</u>                                    | PSR      | = 1.02         | <b>This model would not converge even after increasing convergence criterion from .01 to .05</b> | <b>This model would not converge even after increasing convergence criterion from .01 to .05</b> | = 1.02         | = 1.02     | = 1.02     |
|                                                                                                                                         | PPC      | = p < .05      |                                                                                                  |                                                                                                  | = ns (p > .18) | = p < .05  | = p < .01  |
|                                                                                                                                         | DIC      | = 7730.38      |                                                                                                  |                                                                                                  | = 7147.93      | = 14398.58 | = 1888.83  |
|                                                                                                                                         | Loadings | ?              |                                                                                                  |                                                                                                  | ? (11/12)      | ? (10/12)  | ? (11/12)  |
| <u>11. Discrete first-order factors for NA items and single PA factor</u><br>AC, AP and DP and PA                                       | PSR      | = 1.02         | = 1.02                                                                                           | = 1.01                                                                                           | = 1.02         | = 1.02     | = 1.02     |
|                                                                                                                                         | PPC      | = p < .01      | = p < .01                                                                                        | = p < .01                                                                                        | = p < .01      | = p < .01  | = p < .01  |
|                                                                                                                                         | DIC      | = 7813.26      | = 526189.13                                                                                      | = 9063.16                                                                                        | = 7256.16      | = 14530.06 | = 19012.81 |
|                                                                                                                                         | Loadings | +              | +                                                                                                | +                                                                                                | ? (11/12)      | +          | +          |
| <u>12. Discrete first-order factors for NA items and single PA factor with response bias factors</u>                                    | PSR      | = 1.02         | = 1.02                                                                                           | = 1.02                                                                                           | = 1.02         | = 1.02     | = 1.02     |
|                                                                                                                                         | PPC      | = ns (p > .48) | = p < .01                                                                                        | = ns (p > .20)                                                                                   | = ns (p > .16) | = p < .05  | = p < .01  |
|                                                                                                                                         | DIC      | = 7713.03      | = 51366.50                                                                                       | = 8835.52                                                                                        | = 7152.49      | = 14394.78 | = 18870.16 |
|                                                                                                                                         | Loadings | ? 5/6          | ? (5/6)                                                                                          | ? (4/6)                                                                                          | ? (11/12)      | ? (11/12)  | ? (11/12)  |
| <u>13. Discrete first order factors loading onto two second order factors</u><br>AC, AP, BE, TV and DP<br>PA (with DP) and NA (with DP) | PSR      | = 1.02         | = 1.02                                                                                           | = 1.02                                                                                           | = 1.02         | = 1.02     | = 1.02     |
|                                                                                                                                         | PPC      | = p < .01      | = p < .01                                                                                        | = p < .01                                                                                        | = p < .01      | = p < .01  | = p < .01  |
|                                                                                                                                         | DIC      | = 7817.48      | = 52647.37                                                                                       | = 9063.79                                                                                        | = 7265.95      | = 14560.95 | = 19026.07 |
|                                                                                                                                         | Loadings | +              | +                                                                                                | +                                                                                                | ? (11/12)      | +          | +          |
| <u>14. Discrete first order factors loading onto two second order factors with response bias factors</u>                                | PSR      | = 1.02         | = 1.02                                                                                           | = 1.02                                                                                           | = 1.02         | = 1.02     | = 1.02     |
|                                                                                                                                         | PPC      | = ns (p > .05) | = p < .01                                                                                        | = p < .01                                                                                        | = ns (p > .20) | = p < .05  | = p < .01  |
|                                                                                                                                         | DIC      | = 7731.51      | = 51407.42                                                                                       | = 8850.50                                                                                        | = 7146.56      | = 14399.64 | = 18902.02 |
|                                                                                                                                         | Loadings |                | -                                                                                                | ? (8/9)                                                                                          | ? (17/18)      | ? (16/18)  | -          |

*Notes:* : AC = Anxiety–Comfort; AP- Angry–Placid; BE = Bored–Enthusiastic; TV = Tiredness–Vigor; DP = Displeasure–Pleasure; NA = negative activated affect; PA = positive activated affect; PSR = potential scale reduction; PPC = posterior predictive checking; DIC = deviance information criteria. “C” = (next to PSR ) indicates convergence criteria increased to get model to run to conclusion; “+” = All substantive loadings (within- and between- if appropriate) in hypothesized direction and p < .05; “?” (n) = All substantive loadings (within- and between- if appropriate) in hypothesized direction and most p < .05 – numbers in brackets is number of sig loadings/number of potential substantive significant loadings; “-“ = Some loadings non-significant in opposite direction; “--” = No loadings significant or some loadings significant in opposite direction. Two response bias factors were fitted– one for positively valenced items and one for negatively valenced items

**Table 4: Descriptive statistics for 20-item Positive and Negative Affect Schedule (PANAS)**

| Scale                  | Range | Mean | Standard deviation<br>(level 1/level 2) | Skew | Kurtosis |
|------------------------|-------|------|-----------------------------------------|------|----------|
| PANAS PA (n=574/ N=39) | 5.00  | 2.94 | .83/.74                                 | -.31 | .29      |
| PANAS NA (n=575/ N=39) | 3.30  | 1.29 | .42/.69                                 | 1.49 | 3.87     |

*Notes:* NA = negative activated affect; PA = positive activated affect; Level-2 standard deviations (SDs) are calculated by taking the SD for each individual's set of level-1 data and then averaging these across N=39 cases at level-2.

**Table 5: Within- and between-person multi-level alpha reliabilities for Daniels Five-factor measure of Affective Well-being (D-FAW)**

| Scale      | Within-person alpha | Between-person alpha | Alpha, estimated through<br>SPSS (within-person) |
|------------|---------------------|----------------------|--------------------------------------------------|
| AC         | .55                 | .46                  | .67                                              |
| AP         | .59                 | .78                  | .55                                              |
| DP         | .59                 | .76                  | .66                                              |
| BE         | .49                 | .43                  | .59                                              |
| TV         | .50                 | .24                  | .31                                              |
| NA (AC+AP) | .74                 | .81                  | .80                                              |
| PA (BE+TV) | .67                 | .57                  | .66                                              |
| NA + DP    | .79*                | .87*                 | .85                                              |
| PA + DP    | .75*                | .80*                 | .80                                              |

*Notes:* \* Model not identified; AC = Anxiety–Comfort; AP- Angry–Placid; BE = Bored–Enthusiastic; TV = Tiredness–Vigor; DP = Displeasure–Pleasure; NA = negative activated affect; PA = positive activated affect; SPSS = statistical package for the social sciences.

**Table 6: Predicting Positive and Negative Affect Schedule (PANAS) factors of affective well-being (AWB) with factors of 10-item Daniels Five-factor measure of Affective Well-being (D-FAW)**

*Model 1: Predicting PANAS NA*

| Variable                            | Null (2-level)   | Step 1           | Step 2           |
|-------------------------------------|------------------|------------------|------------------|
| Intercept                           | .001 (.099)      | .044 (.102)      | .043 (.102)      |
| Fixed effects                       |                  |                  |                  |
| AC                                  |                  | .454 (.038)**    | .491 (.037)**    |
| AP                                  |                  | .172 (.041)**    | .225 (.038)**    |
| DP                                  |                  | -.141 (.039)**   | <i>removed</i>   |
| Level one variance (within-person)  | .670 (.041)**    | .301 (.019)**    | .309 (.019)**    |
| Level two variance (between-person) | .335 (.087)**    | .382 (.092)**    | .381 (.092)**    |
| 2* log likelihood                   | 1460.538 (N=566) | 1024.804 (N=556) | 1037.476 (N=556) |
| Chi-squared difference in model fit |                  | 435.74 (3df)**   | 12.68 (1df)**    |
|                                     |                  | From null        | From Step 1      |

*Model 2: Predicting PANAS PA*

| Variable                            | Null (2-level)   | Step 1          | Step 2          |
|-------------------------------------|------------------|-----------------|-----------------|
| Intercept                           | .002 (.104)      | .035 (.105)     | .034 (.105)     |
| Fixed effects                       |                  |                 |                 |
| BE                                  |                  | .431 (.032)**   | .502 (.030)**   |
| TV                                  |                  | .266 (.030)**   | .301 (.030)**   |
| DP                                  |                  | .167 (.032)**   | <i>removed</i>  |
| Level one variance (within-person)  | .636 (.039)**    | .200 (.012)**   | .211 (.013)**   |
| Level two variance (between-person) | .375 (.096)**    | .411 (.097)**   | .410 (.097)**   |
| 2* log likelihood                   | 1437.056 (N=566) | 814.532 (N=556) | 841.793 (N=556) |
| Chi-squared difference in model fit |                  | 622.524 (3df)** | 27.261 (1df)**  |
|                                     |                  | From Null       | From Step 1     |

*Notes:* DP = Daniels' measure of Depression–Pleasure (happy, gloomy: reversed); AC = Daniels' measure of Anxiety–Comfort (anxious, at ease: reversed); AP = Daniels' measure of Angry–Placid (annoyed, calm: reversed). DP = BE = Daniels' measure of Bored–Enthusiastic (motivated, bored: reversed); TV = Daniels' measure of Tired–Vigour (active, tired: reversed). NA = negative activated affect; PA = positive activated affect; Standard errors are shown in brackets. \* =  $p < .05$ ; \*\* =  $p < .01$

**Figures 2a–g: Factor structures tested for in 10-item Daniels Five-factor measure of Affective Well-being (D-FAW) (and the models represented)**

**Figure 2a: The first order single factor structure of Daniels Five-factor measure of Affective Well-being (D-FAW) (Models 1\* and 2\*\*)**

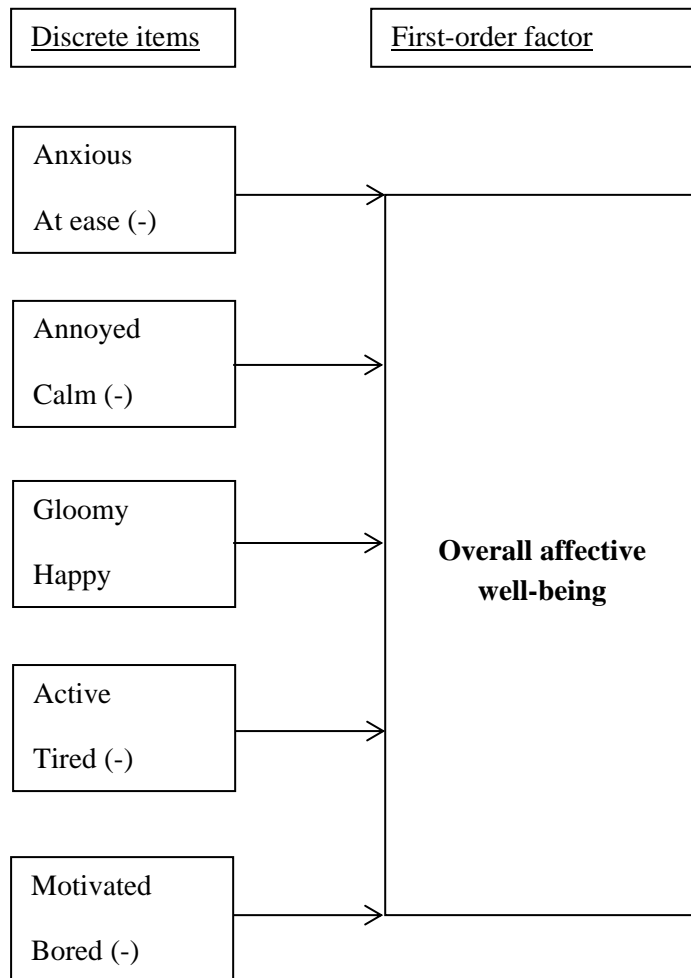

*Notes:* \*without response bias factors; \*\*with response bias factors

**Figure 2b: The first order two-factor structure of Daniels Five-factor measure of Affective Well-being (D-FAW) (Models 3\* and 4\*\*)**

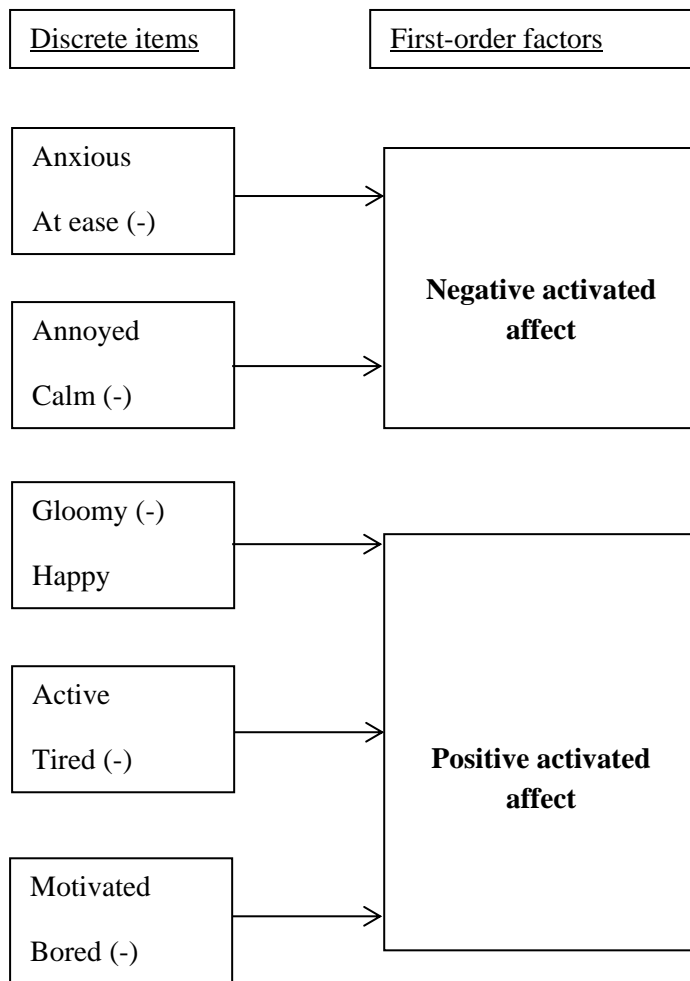

*Notes:* \*without response bias factors; \*\*with response bias factors



**Figure 2c: The first order five-factor structure of Daniels Five-factor measure of Affective Well-being (D-FAW) (Models 5\* and 6\*\*)**

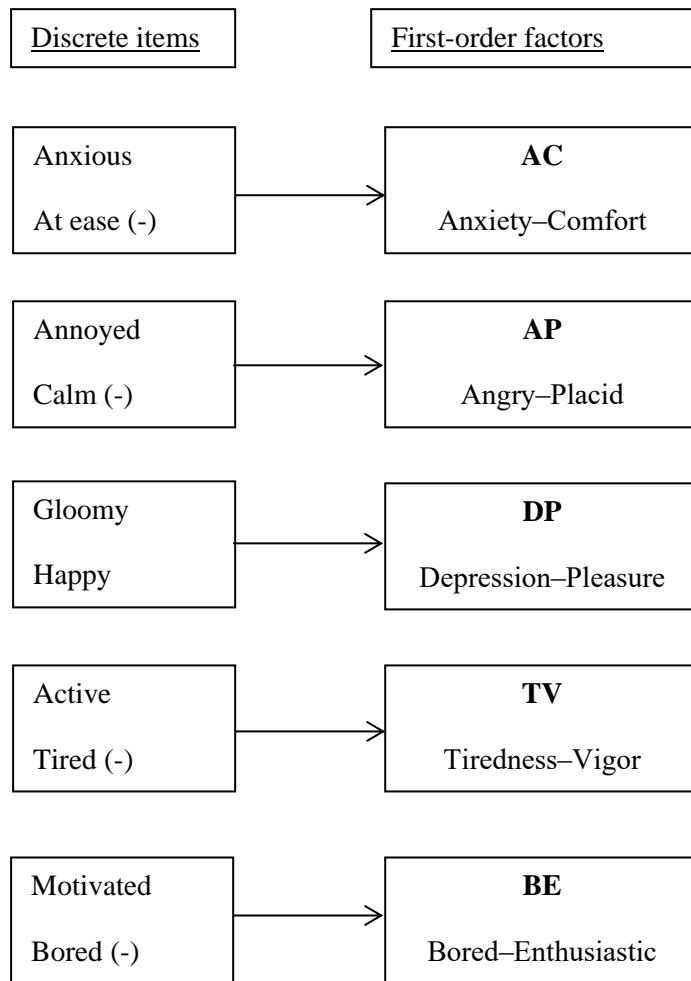

*Notes:* \*without response bias factors; \*\*with response bias factors

**Figure 2d: The five-factor first order and single second order factor structure of Daniels Five-factor measure of Affective Well-being (D-FAW) (Models 7\* and 8\*\*)**

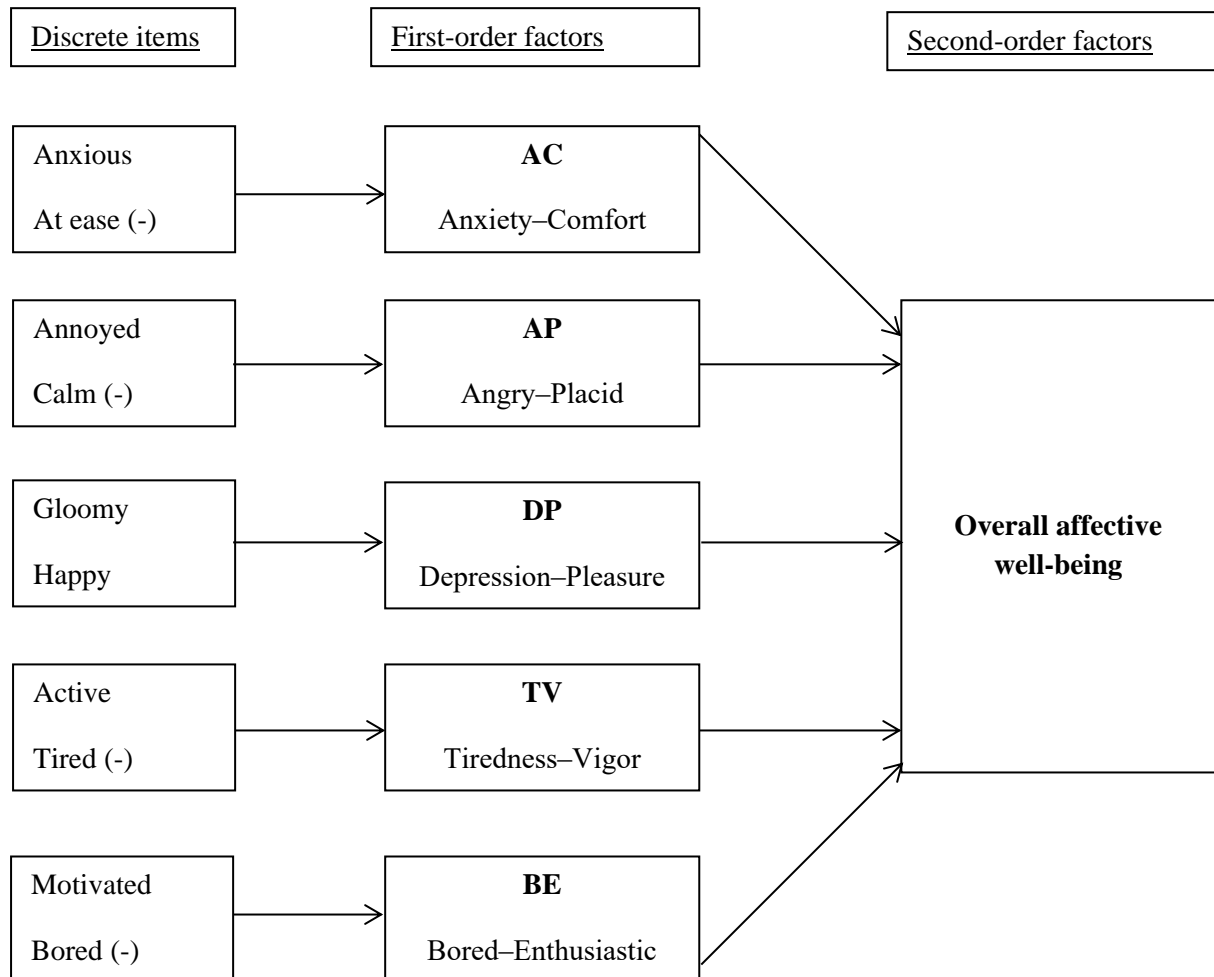

*Notes:* \*without response bias factors; \*\*with response bias factors

**Figure 2e: The first order PA-related factors and single NA factor structure of Daniels Five-factor measure of Affective Well-being (D-FAW) (Models 9\* and 10\*\*)**

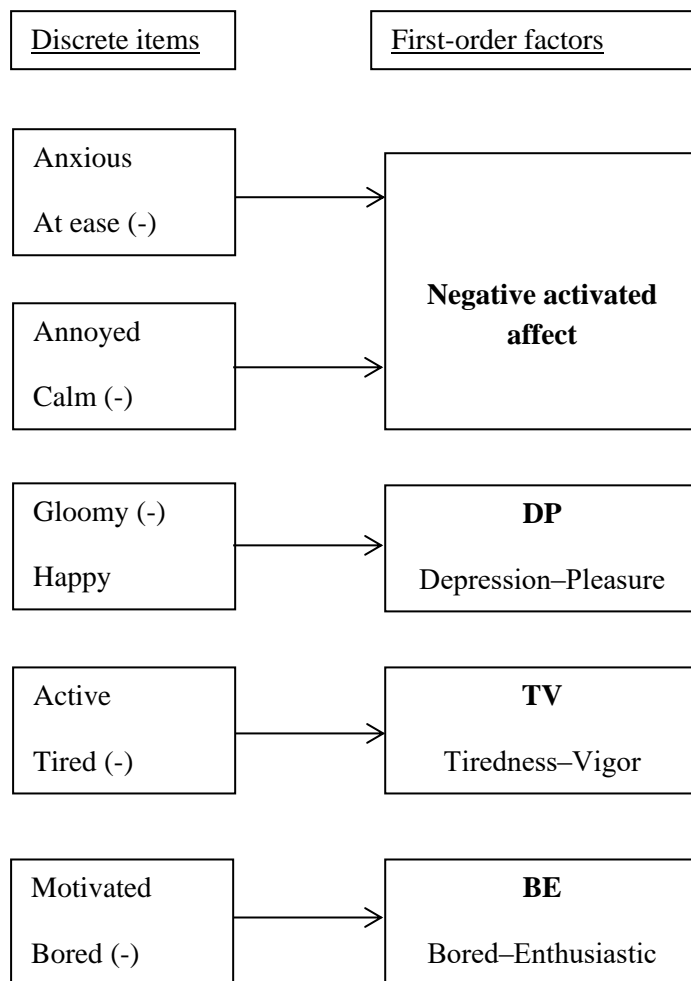

*Notes:* \*without response bias factors; \*\*with response bias factors; NA = negative activated affect; PA = positive activated affect.

**Figure 2f: The first order NA-related factors and single PA factor structure of Daniels Five-factor measure of Affective Well-being (D-FAW) (Models 11\* and 12\*\*)**

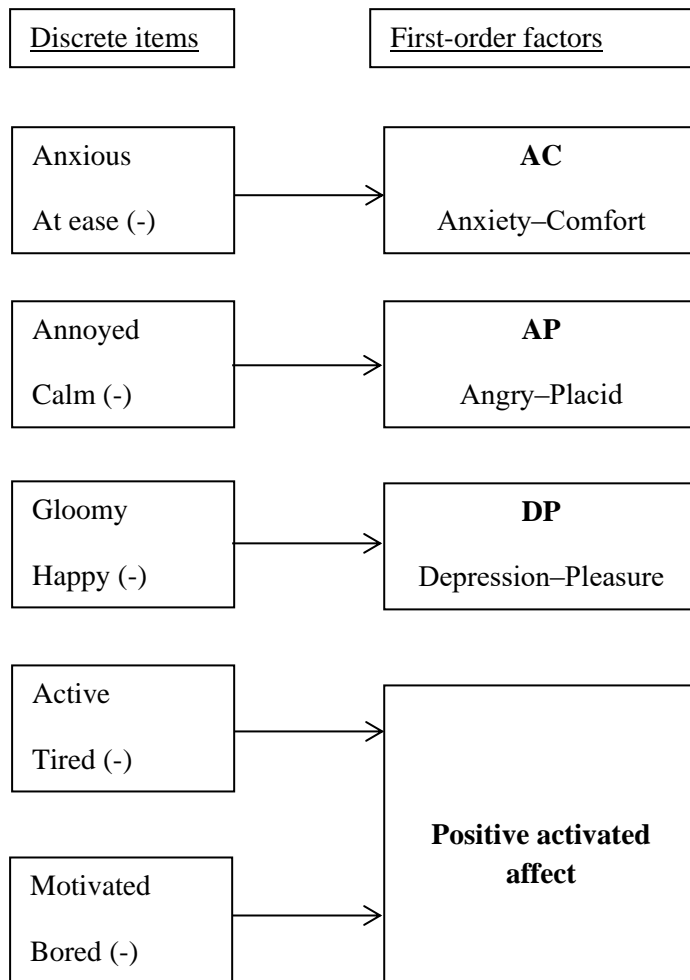

*Notes:* \*without response bias factors; \*\*with response bias factors; NA = negative activated affect; PA = positive activated affect.

**Figure 2g: The Daniels Five-factor measure of Affective Well-being (D-FAW) long-form factor structure applied to the 10-item short-form (Models 13\* and 14\*\*)**

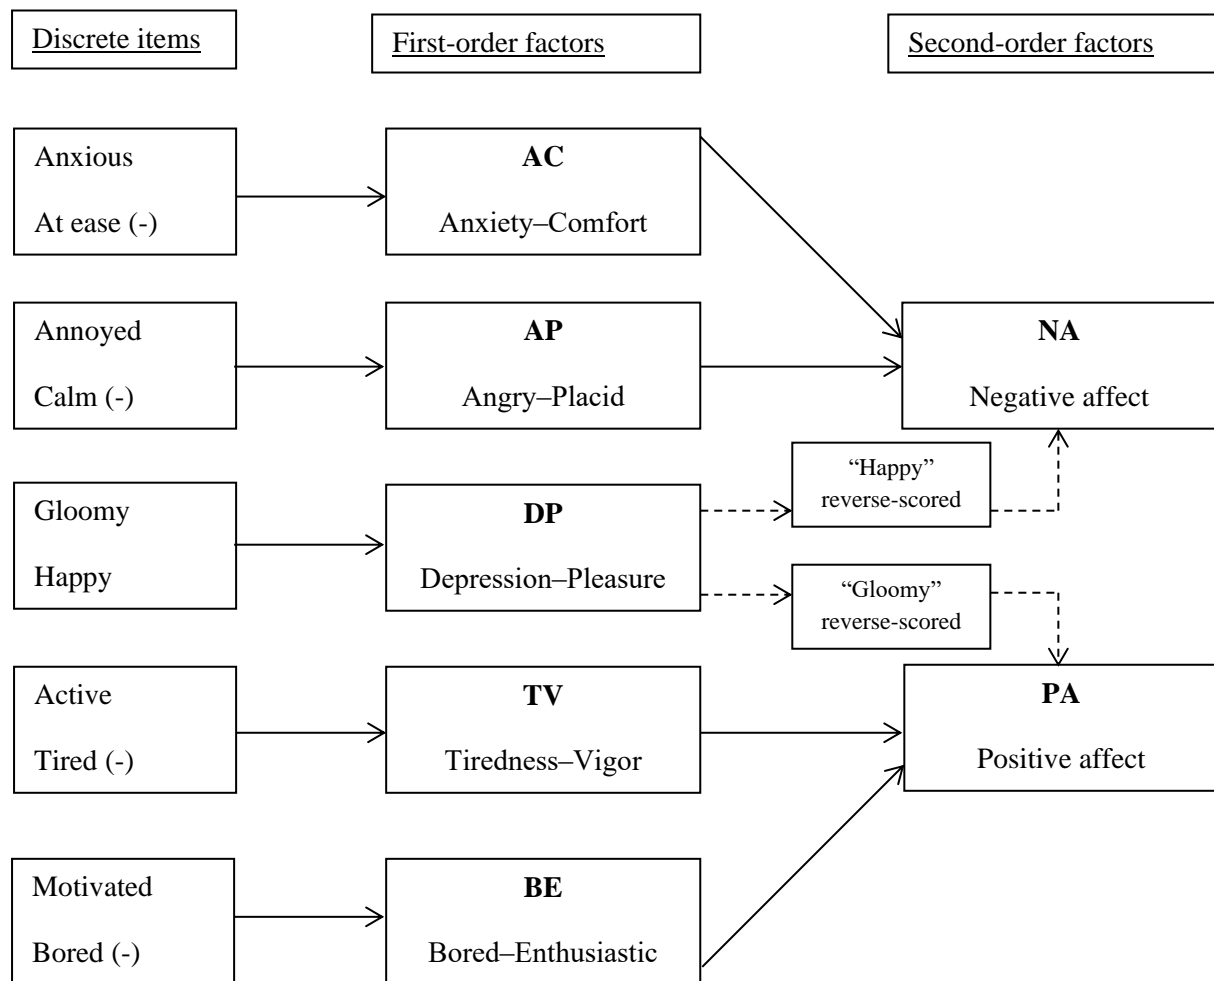

Notes: \*without response bias factors; \*\*with response bias factors; NA = negative activated affect; PA = positive activated affect.

**Figure 3: The best-fitting factor structure (Model 6) of 10-item Daniels Five-factor measure of Affective Well-being (D-FAW) with unstandardized item loading ranges across the samples (Between/Within Subjects)**

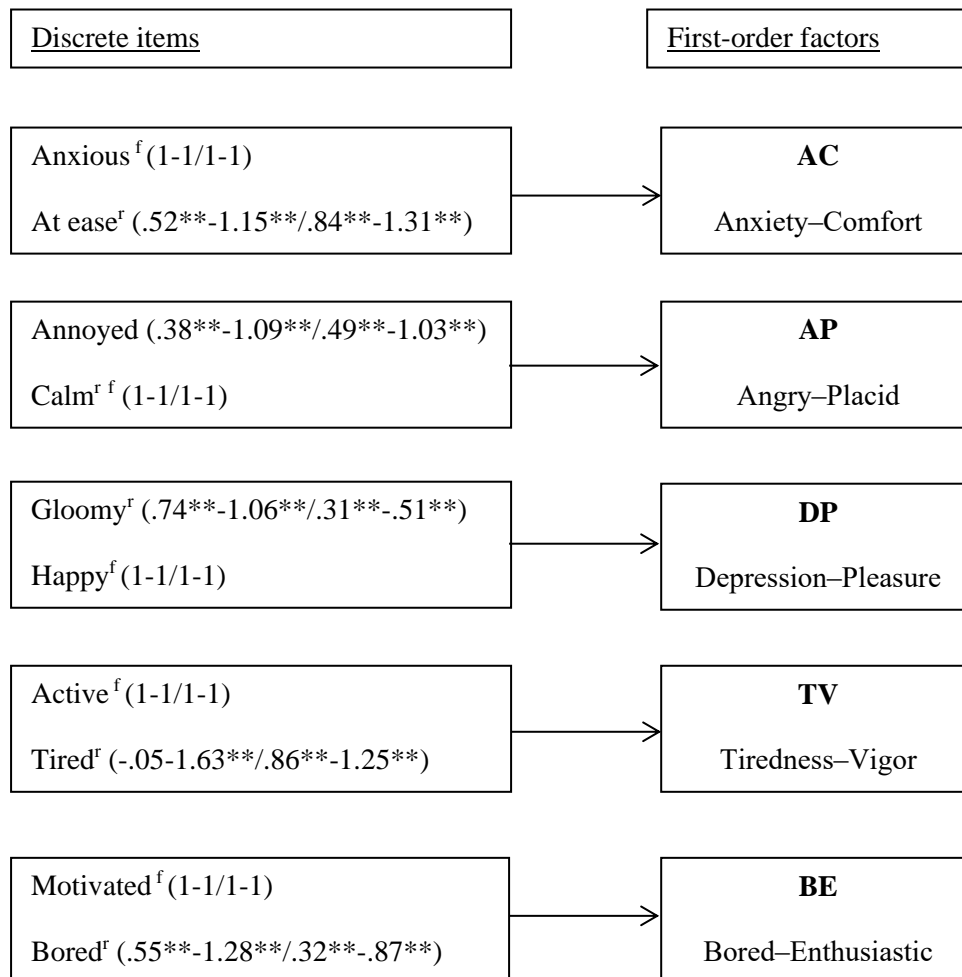

*Notes:*

<sup>r</sup>Reversed coded

<sup>f</sup>Loading fixed at 1

\*\*  $p < .05$ , \*  $p < .01$

N.B. Please see Appendix 3 for detailed breakdown of factor loadings per sample at between and within-persons levels across all samples for Model 6. Factor loadings greater than unity are acceptable as these are unstandardized regression weights.

**Appendix 2: The long-form 30-item Daniels Five-factor measure of Affective Well-being (D-FAW) (with 10-items extracted post-administration, highlighted)**

In the section below, please indicate how you feel *right now, that is, at the present moment\**. Please circle the most appropriate number on the 6 point scale, where 1 = not at all, to 6 = very much.

|                |   |   |   |   |   |   |
|----------------|---|---|---|---|---|---|
| Anxious        | 1 | 2 | 3 | 4 | 5 | 6 |
| Worried        | 1 | 2 | 3 | 4 | 5 | 6 |
| Tense          | 1 | 2 | 3 | 4 | 5 | 6 |
| Relaxed        | 1 | 2 | 3 | 4 | 5 | 6 |
| Comfortable    | 1 | 2 | 3 | 4 | 5 | 6 |
| Calm           | 1 | 2 | 3 | 4 | 5 | 6 |
| Depressed      | 1 | 2 | 3 | 4 | 5 | 6 |
| Miserable      | 1 | 2 | 3 | 4 | 5 | 6 |
| Gloomy         | 1 | 2 | 3 | 4 | 5 | 6 |
| Happy          | 1 | 2 | 3 | 4 | 5 | 6 |
| Pleased        | 1 | 2 | 3 | 4 | 5 | 6 |
| Cheerful       | 1 | 2 | 3 | 4 | 5 | 6 |
| Bored          | 1 | 2 | 3 | 4 | 5 | 6 |
| Sluggish       | 1 | 2 | 3 | 4 | 5 | 6 |
| Dull           | 1 | 2 | 3 | 4 | 5 | 6 |
| Enthusiastic   | 1 | 2 | 3 | 4 | 5 | 6 |
| Optimistic     | 1 | 2 | 3 | 4 | 5 | 6 |
| Motivated      | 1 | 2 | 3 | 4 | 5 | 6 |
| Tired          | 1 | 2 | 3 | 4 | 5 | 6 |
| Fatigued       | 1 | 2 | 3 | 4 | 5 | 6 |
| Sleepy         | 1 | 2 | 3 | 4 | 5 | 6 |
| Active         | 1 | 2 | 3 | 4 | 5 | 6 |
| Alert          | 1 | 2 | 3 | 4 | 5 | 6 |
| Full of energy | 1 | 2 | 3 | 4 | 5 | 6 |
| Angry          | 1 | 2 | 3 | 4 | 5 | 6 |
| Annoyed        | 1 | 2 | 3 | 4 | 5 | 6 |
| Aggressive     | 1 | 2 | 3 | 4 | 5 | 6 |
| Placid         | 1 | 2 | 3 | 4 | 5 | 6 |
| Patient        | 1 | 2 | 3 | 4 | 5 | 6 |
| At ease        | 1 | 2 | 3 | 4 | 5 | 6 |

*Notes:* \*This focal instruction can be amended according to time frame and context.

### Appendix 3: Factor loadings from Model 6 first order model

| Scale | Item                 | Sample 1       | Sample 2       | Sample 3       | Sample 4†                      | Sample 5†                      | Sample 6†                      |
|-------|----------------------|----------------|----------------|----------------|--------------------------------|--------------------------------|--------------------------------|
| AC    | At ease              | 0.81**         | 1.15**         | 1.10**         | 1.03**/0.52**                  | 0.84**/0.64**                  | 1.31**/0.70**                  |
|       | Anxious <sup>r</sup> | 1 <sup>f</sup> | 1 <sup>f</sup> | 1 <sup>f</sup> | 1 <sup>f</sup> /1 <sup>f</sup> | 1 <sup>f</sup> /1 <sup>f</sup> | 1 <sup>f</sup> /1 <sup>f</sup> |
| AP    | Calm                 | 1 <sup>f</sup> | 1 <sup>f</sup> | 1 <sup>f</sup> | 1 <sup>f</sup> /1 <sup>f</sup> | 1 <sup>f</sup> /1 <sup>f</sup> | 1 <sup>f</sup> /1 <sup>f</sup> |
|       | Annoyed <sup>r</sup> | 0.38**         | 0.46**         | 0.38**         | 0.79**/0.82**                  | 0.49**/1.09**                  | 1.03**/0.45**                  |
| DP    | Happy                | 1 <sup>f</sup> | 1 <sup>f</sup> | 1 <sup>f</sup> | 1 <sup>f</sup> /1 <sup>f</sup> | 1 <sup>f</sup> /1 <sup>f</sup> | 1 <sup>f</sup> /1 <sup>f</sup> |
|       | Gloomy <sup>r</sup>  | 0.76**         | 0.81**         | 0.75*          | 0.51**/0.74**                  | 0.31**/0.89**                  | 0.37**/1.06**                  |
| BE    | Motivated            | 1 <sup>f</sup> | 1 <sup>f</sup> | 1 <sup>f</sup> | 1 <sup>f</sup> /1 <sup>f</sup> | 1 <sup>f</sup> /1 <sup>f</sup> | 1 <sup>f</sup> /1 <sup>f</sup> |
|       | Bored <sup>r</sup>   | 1.16**         | 1.17**         | 1.28**         | 0.32**/0.55**                  | 0.62**/0.84**                  | 0.87**/0.74**                  |
| TV    | Active               | 1 <sup>f</sup> | 1 <sup>f</sup> | 1 <sup>f</sup> | 1 <sup>f</sup> /1 <sup>f</sup> | 1 <sup>f</sup> /1 <sup>f</sup> | 1 <sup>f</sup> /1 <sup>f</sup> |
|       | Tired <sup>r</sup>   | 1.46**         | 0.12**         | -0.05          | 0.98**/0.39**                  | 0.86**/0.46**                  | 1.25**/1.63**                  |

Notes: AC = Anxiety–Comfort; AP = Angry–Placid; BE = Bored–Enthusiastic; TV = Tiredness–Vigor; DP = Displeasure–Pleasure.

Factor loadings from 1<sup>st</sup> order model (Model 6)

† Within factor loading / Between factor loading

<sup>r</sup> Reversed coded

<sup>f</sup> Loading fixed at 1

\*\* p < .05, \* p < .01

### Appendix 4: Bayesian fit and convergence statistics for response bias factors only

|                      | Fit Statistics | Sample 1 | Sample 2 | Sample 3  | Sample 4 | Sample 5 | Sample 6 |
|----------------------|----------------|----------|----------|-----------|----------|----------|----------|
| <u>Response bias</u> | PSR            | = 1.02   | = 1.02   | = 1.02    | = 1.02   | = 1.02   | = 1.06   |
| <u>factors only</u>  | PPC            | = <.01   | = <.01   | = <.01    | = <.01   | = <.01   | = <.01   |
|                      | DIC            | =        | =        | = 9017.44 | =        | =        | =        |
|                      | Loadings       | 7872.86  | 52263.31 | ++        | 7224.85  | 14817.75 | 19109.86 |
|                      |                | ++       | ++       |           | +        | ++       | +        |

Notes: PSR = potential scale reduction; PPC = posterior predictive checking; DIC = deviance information criteria.

Comparing the results with the results reported in Table 3 reveals that a model with 2 factors representing positively-valenced items only and negatively-valenced items only affect only has less good fit than any model with response bias and substantive factors for any sample.
